# Supplementary material for: Localized and sustained release of brain-derived neurotrophic factor from injectable hydrogel/microparticle composites fosters spinal learning after spinal cord injury
Source: Royal Society of Chemistry journal article supplement (doi:10.1039/c6tb01602b), 2016-01-01
Supplement: c6tb01602b2.pdf [file c6tb01602b2.pdf]

## Supplementary Data

A

| Experiment Number | PLGA concentration in Methylene Chloride | Amount of BSA Loaded ( $\mu\text{g}$ ) | Encapsulation Efficiency |
|-------------------|------------------------------------------|----------------------------------------|--------------------------|
| 1                 | 10%                                      | 15                                     | 19.35%                   |
| 2                 | 20%                                      | 15                                     | 21.71%                   |
| 3                 | 30%                                      | 15                                     | 21.95%                   |
| 4                 | 10%                                      | 30                                     | 30.91%                   |
| 5                 | 10%                                      | 60                                     | 21.75%                   |

B

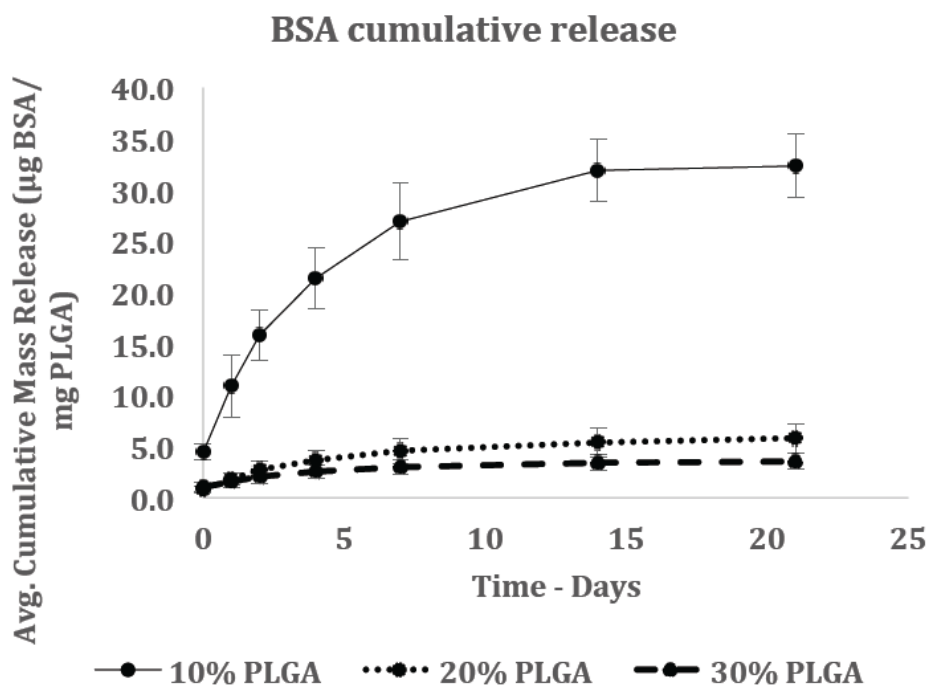

**Figure S1.** Encapsulation efficiency and release kinetics of BSA particles: A) Table showing encapsulation efficiency of PLGA microparticles with different amount of loaded BSA protein while keeping PLGA concentration constant. B) *In vitro* release profiles of BSA loaded PLGA MPs. 5 mg of BSA particles with different concentrations of PLGA to methylene chloride concentrations were dissolved in 1 mL of PBS with 2 % Tween-20 (v/v) and incubated at 37°C with rocking for 21 days.
